# Supplementary material for: Screening of Differentially Expressed Genes and Localization Analysis of Female Gametophyte at the Free Nuclear Mitosis Stage in Pinus tabuliformis Carr
Source: MDPI journal article supplement (doi:10.3390/ijms23031915), 2022-02-08

FER

profile 0 (7259 genes)

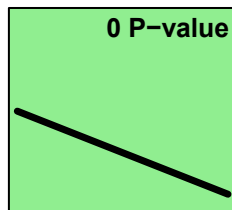

profile 1 (5422 genes)

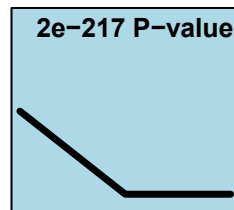

profile 6 (4403 genes)

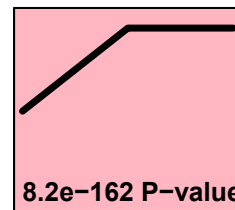

profile 7 (4079 genes)

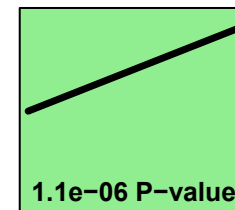

profile 3 (3885 genes)

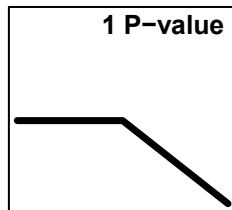

profile 4 (2562 genes)

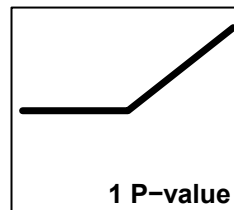

profile 2 (2288 genes)

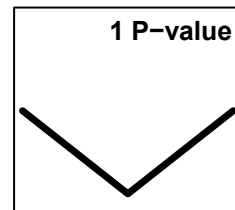

profile 5 (1030 genes)

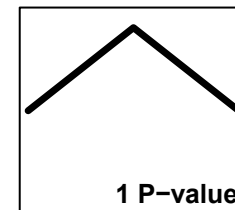

profile 1 (7832 genes)

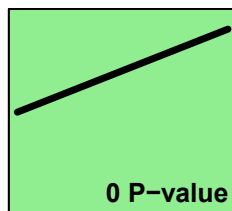

profile 6 (5441 genes)

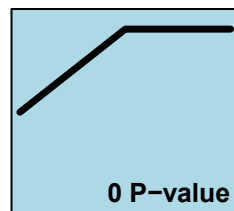

profile 0 (5076 genes)

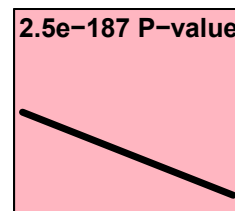

profile 1 (4288 genes)

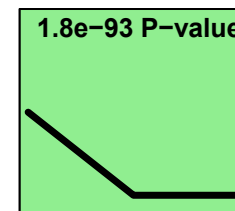

STE

profile 2 (3879 genes)

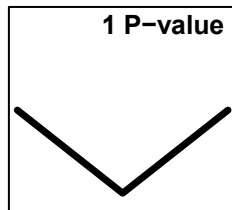

profile 3 (2533 genes)

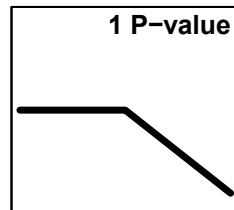

profile 4 (2427 genes)

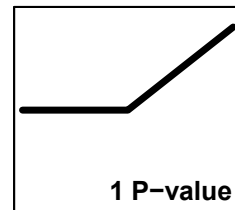

profile 5 (1307 genes)

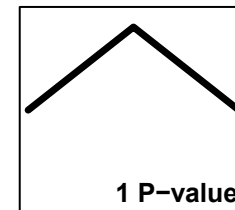

Supplement: s1 [file s1]
