# Supplementary figures and images for: Screening of Differentially Expressed Genes and Localization Analysis of Female Gametophyte at the Free Nuclear Mitosis Stage in Pinus tabuliformis Carr
Source: MDPI journal article supplement (doi:10.3390/ijms23031915), 2022-02-08

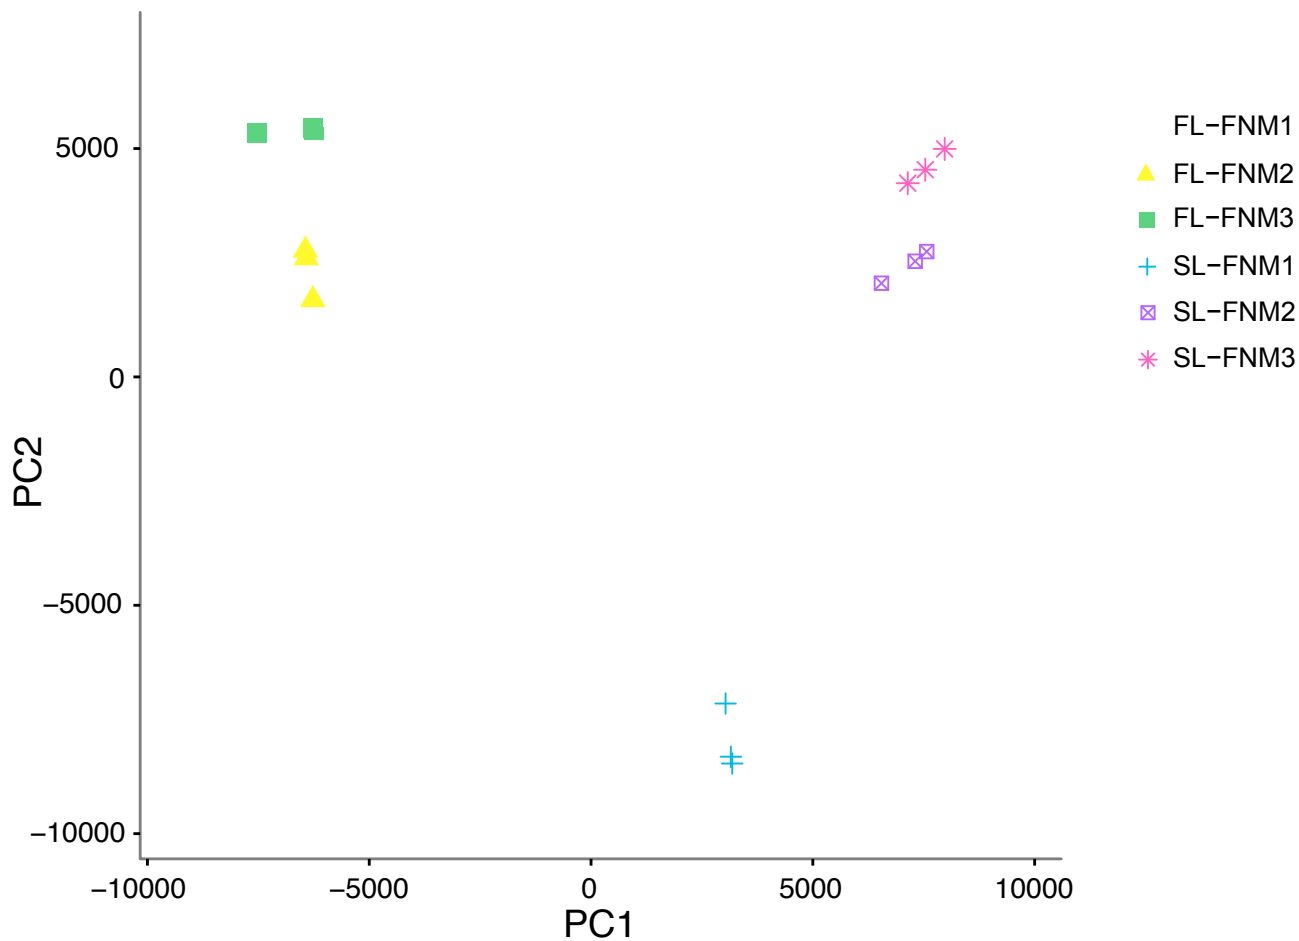

Supplement: s1 [file s1]

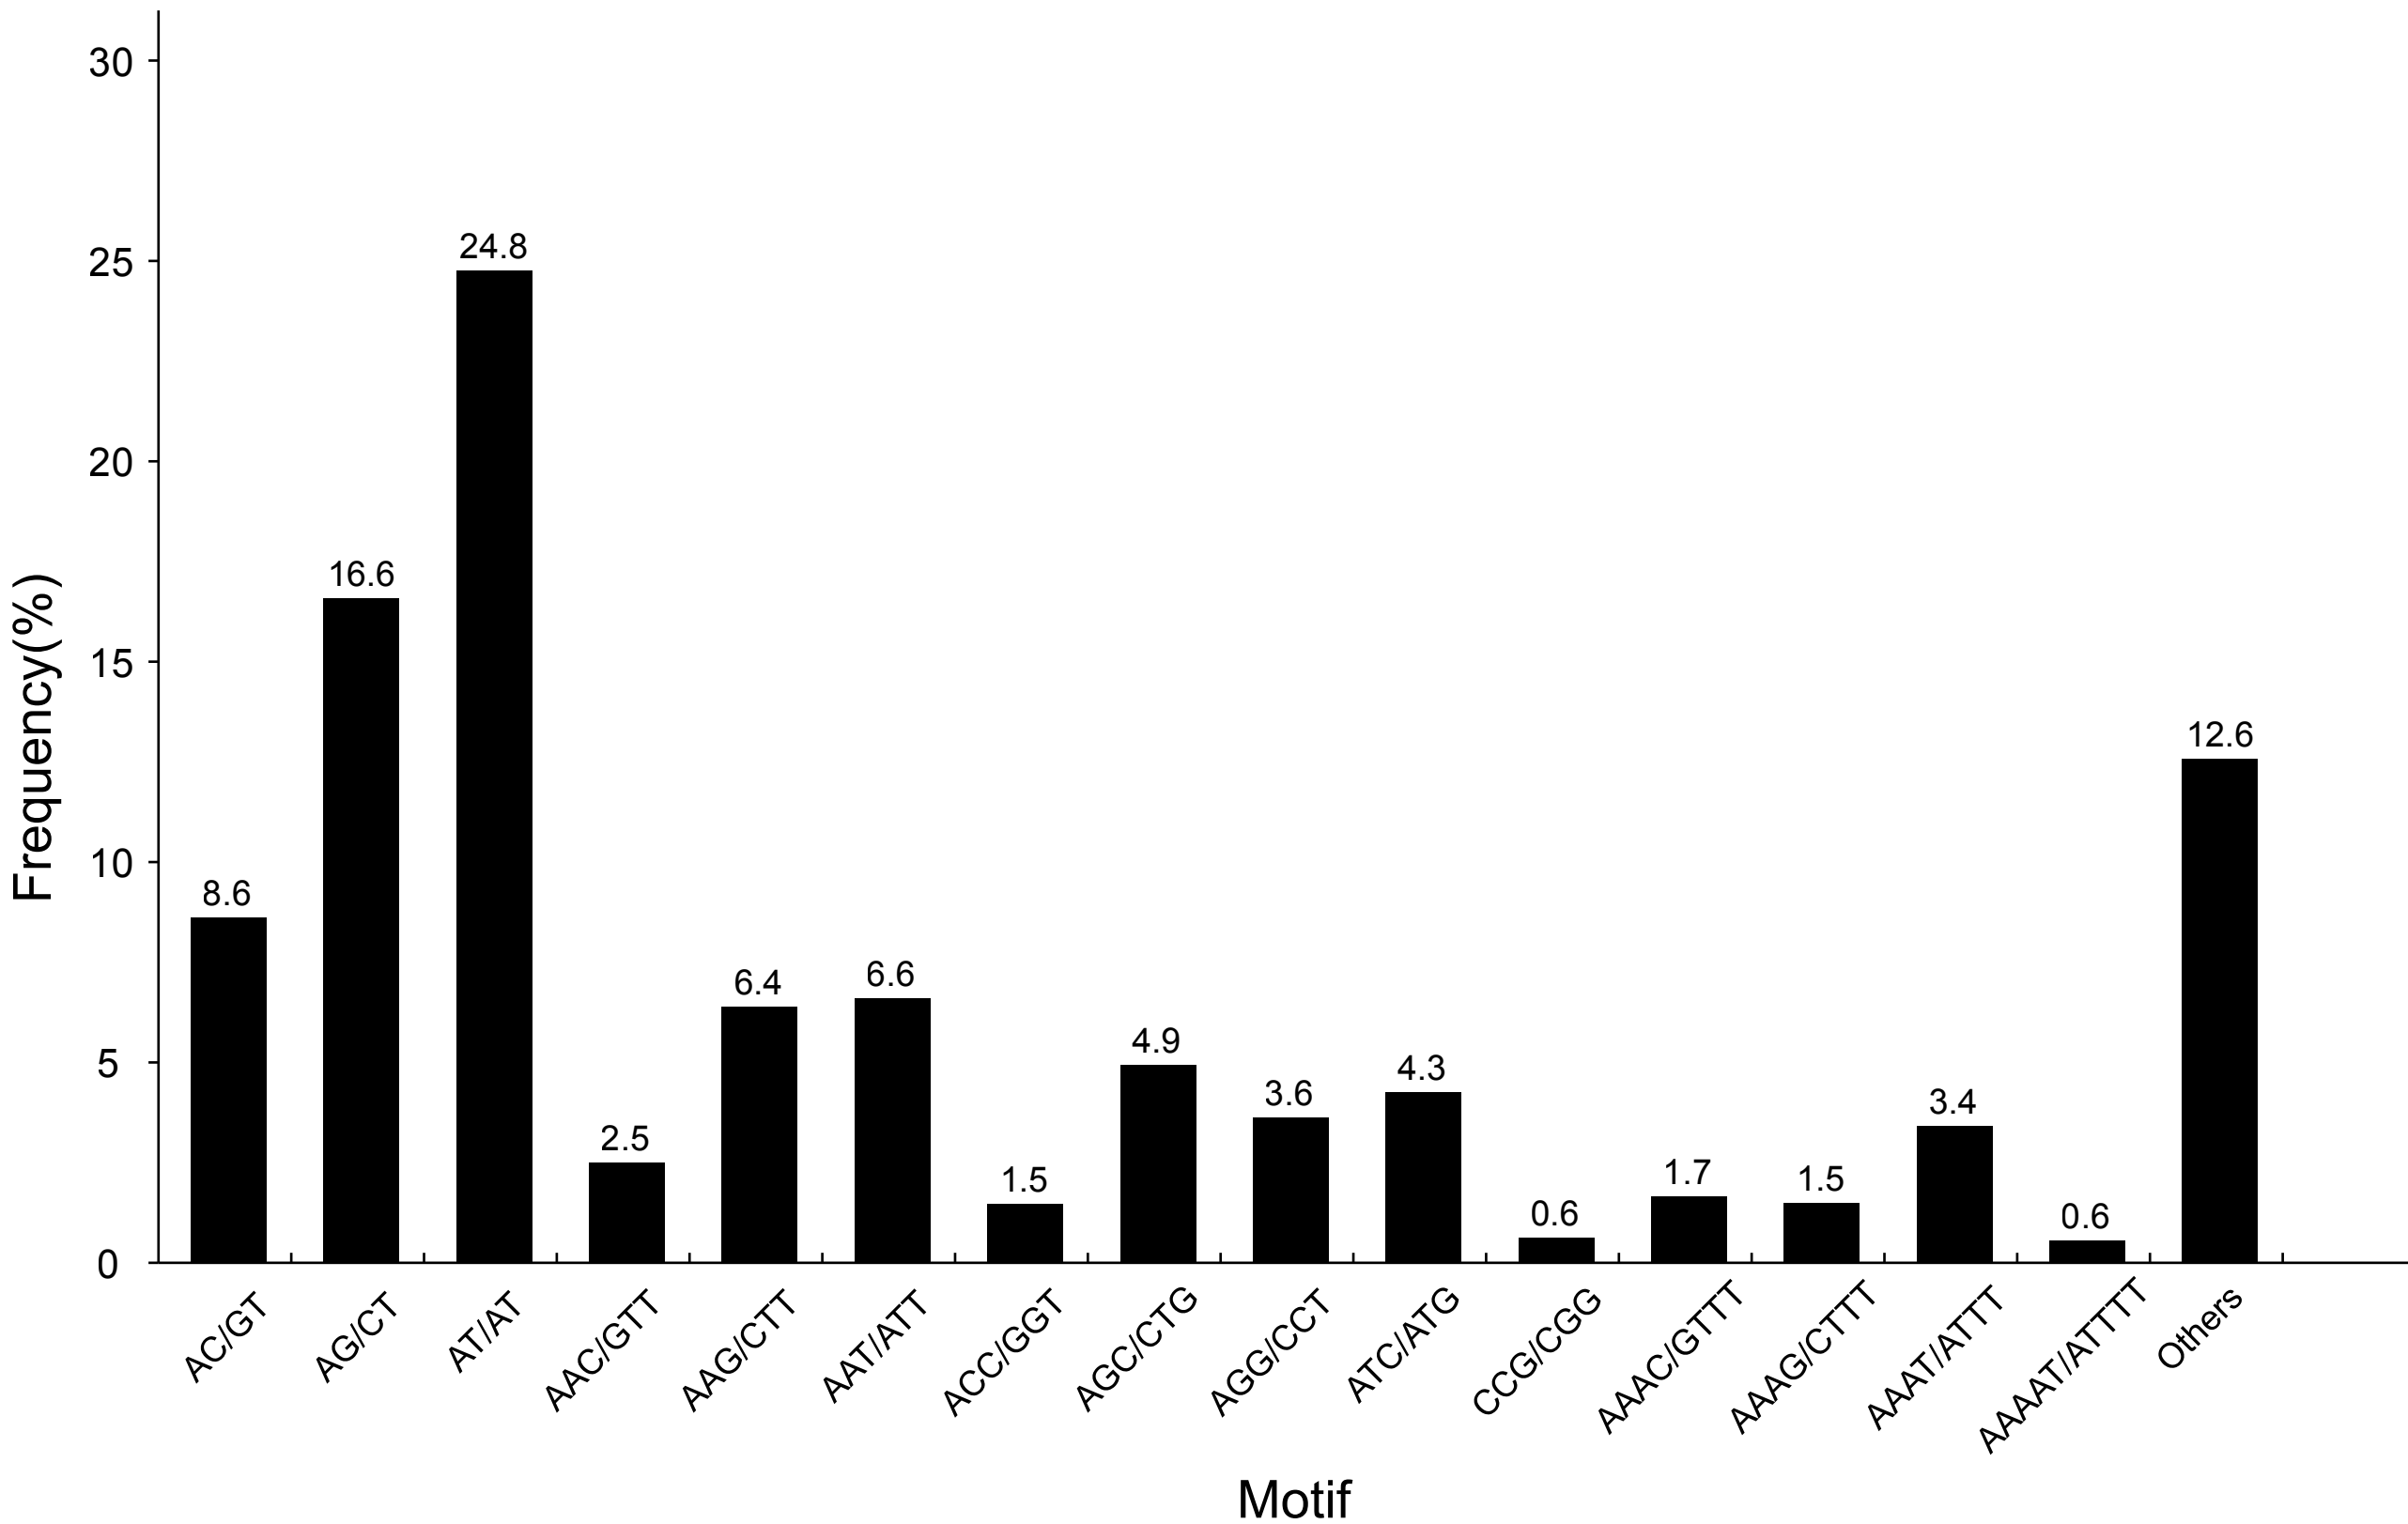

Supplement: s1 [file s1]
